# Supplementary material
Source: Preprints.org preprint supplement (doi:10.20944/preprints201912.0345.v1)
Supplement: Supplementary file 1 [file supplementary]

**Highlights:**

- Gold nanoparticles (Au NPs) have been synthesized using a facile, fast and single step advanced hydrothermal method.
- In the synthesis part, we used biomaterial: *Elaeocarpus ganitrus* seeds extract as reducing and stabilizing agent.
- Au NPs were non-toxic to *Elaeocarpus ganitrus* and are environmentally safe.
- The synthesized nanoparticles showed promising antibacterial, antioxidant and anticancer activity against PC-3 cell lines.
